# Supplementary material
Source: MDPI journal article supplement (https://www.mdpi.com/2071-1050/9/10/1725)
Supplement: s1 [file s1]

# Supplementary Data: A Comparative Life Cycle Assessment between a Metered Dose Inhaler and Electric Nebulizer

Brandon Goulet, Lars Olson and Brooke K. Mayer

Figure S1 shows the two devices assessed in this comparative life cycle assessment (LCA) study.

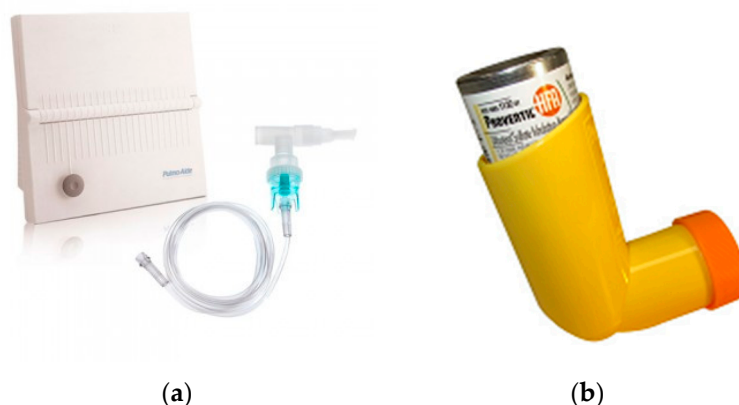

**Figure S1.** (a) DeVilbiss Pulmo-Aide® electric nebulizer and (b) 3M's Proventil® HFA metered dose inhaler.

Figures S2, S3, and S4 show the GaBi flow diagram inventories of the scenarios modeled: metered dose inhaler, nebulizer with hand washing, and nebulizer with dish washing, respectively.

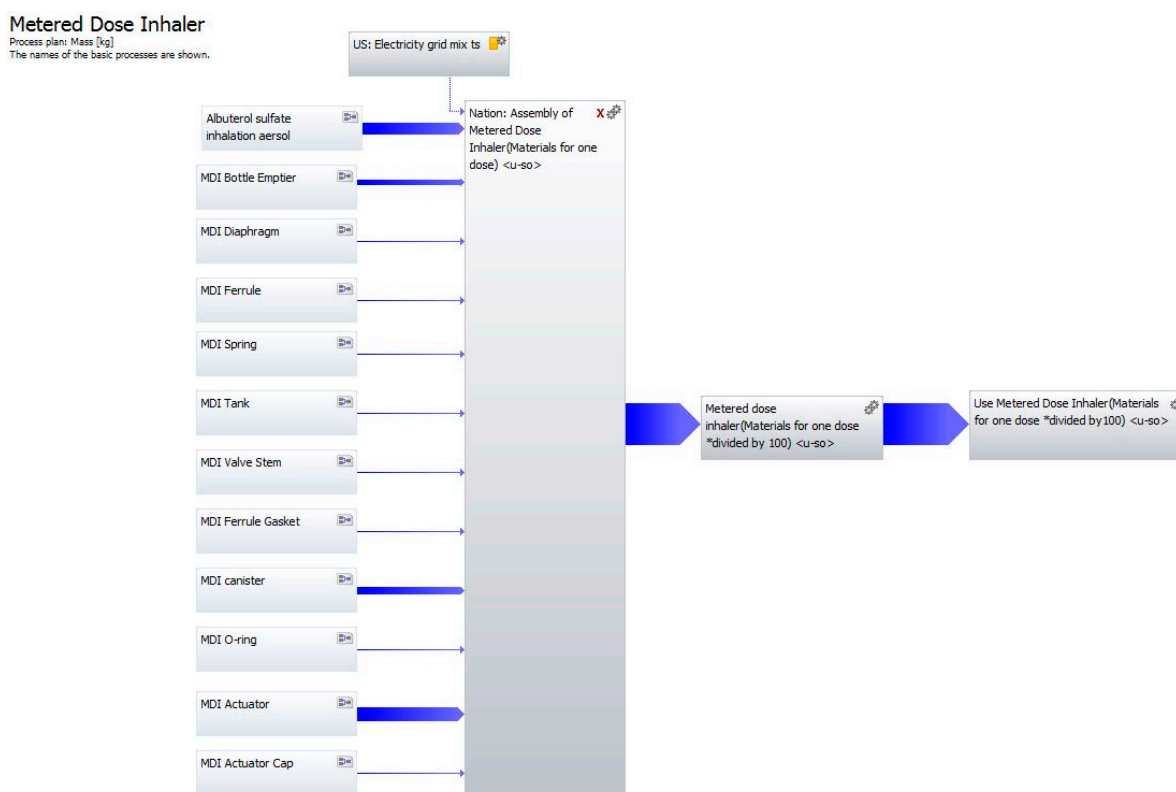

**Figure S2.** Life cycle assessment (LCA) inventory for the manufacturing and use of a metered dose inhaler (MDI).

### DeVilbiss Pulmo-Aide Nebulizer - Handwash

Process plant: Mass [kg]  
The names of the basic processes are shown.

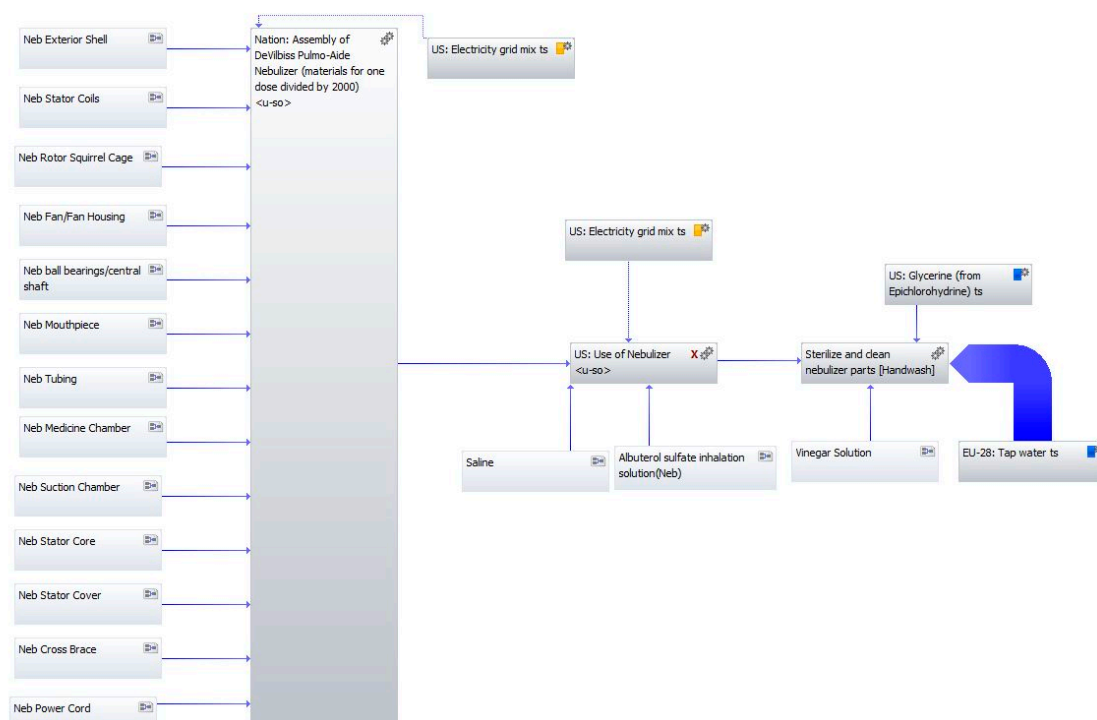

**Figure S3.** Life cycle assessment (LCA) inventory for the manufacturing and use of an electrical nebulizer when it is washed by hand.

### DeVilbiss Pulmo-Aide Nebulizer - Dishwasher

Process plant: Mass [kg]  
The names of the basic processes are shown.

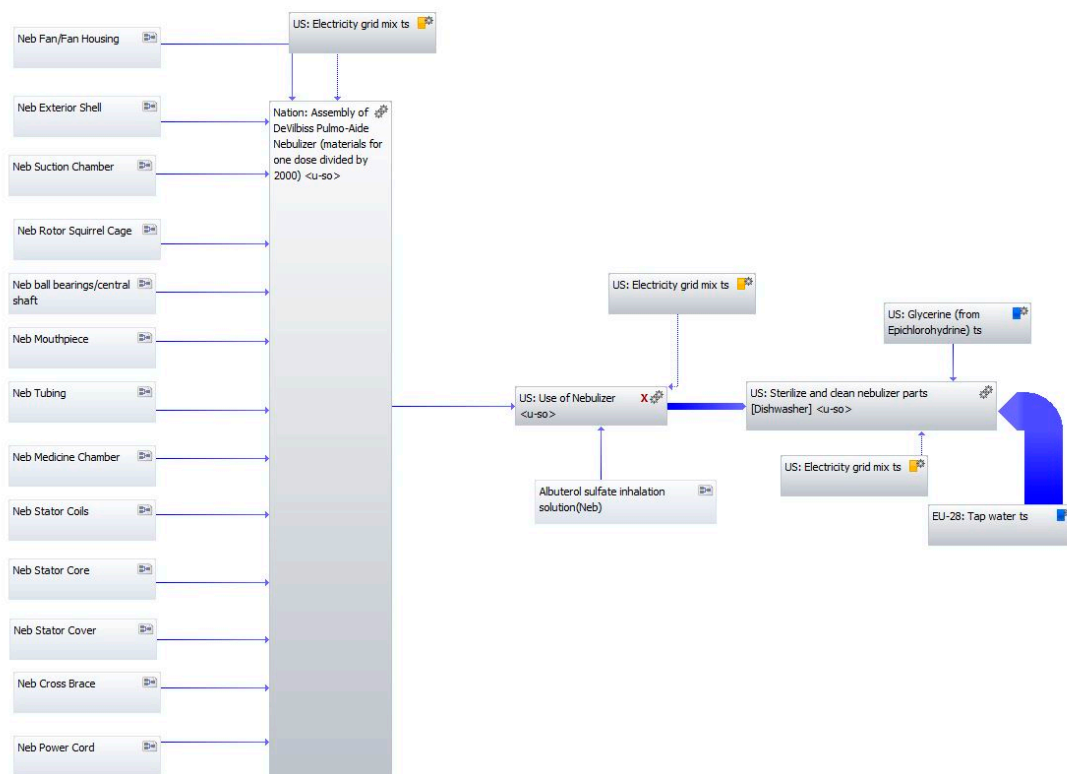

**Figure S4.** Life cycle assessment (LCA) inventory for the manufacturing and use of an electric nebulizer when it is washed in a dishwasher.
